# Supplementary material
Source: PubMed Central journal article supplement (PMC7281354)

## Supplementary Online Content

Lioutas V-A, Beiser AS, Aparicio HJ, et al. Assessment of incidence and risk factors of intracerebral hemorrhage among participants in the Framingham Heart Study between 1948 and 2016. *JAMA Neurol*. Published online June 8, 2020.  
doi:10.1001/jamaneurol.2020.1512

**eTable 1.** Age-Specific and Sex-Specific Deep Intracerebral Hemorrhage Incidence Rates in the Framingham Heart Study, 1948-2016

**eTable 2.** Age-Specific and Sex-Specific Lobar Intracerebral Hemorrhage Incidence Rates in the Framingham Heart Study, 1948-2016

**eTable 3.** Unadjusted and Age-Adjusted Incidence Rate Ratios of Intracerebral Hemorrhage in Men vs Women

**eTable 4.** Anticoagulant Use Trends

**eFigure 1.** Age-Stratified and Sex-Stratified Incidence of Intracerebral Hemorrhage

**eFigure 2.** Incidence Rate of Lobar and Deep Intracerebral Hemorrhage Stratified by Age

This supplementary material has been provided by the authors to give readers additional information about their work.

**eTable 1.** Age-Specific and Sex-Specific Deep Intracerebral Hemorrhage Incidence Rates in the Framingham Heart Study, 1948-2016

| Age group (years) | Women |        |       | Men |        |       | Combined women and men |        |       |
|-------------------|-------|--------|-------|-----|--------|-------|------------------------|--------|-------|
|                   | N     | PY     | Rate* | N   | PY     | Rate* | N                      | PY     | Rate* |
| 45-74             | 7     | 132838 | 5     | 10  | 108711 | 9     | 17                     | 241549 | 7     |
| 75-84             | 7     | 26220  | 27    | 5   | 16588  | 30    | 12                     | 42808  | 28    |
| 85-99             | 9     | 11394  | 79    | 6   | 4564   | 131   | 15                     | 15958  | 94    |
| 45-99             | 23    | 170452 | 13    | 21  | 129863 | 16    | 44                     | 300315 | 15    |
| Age-Adjusted      | ..    | ..     | 12    | ..  | ..     | 19    | ..                     | ..     | ..    |

PY: person-years  
\* per 100,000 person-years

**eTable 2.** Age-Specific and Sex-Specific Lobar Intracerebral Hemorrhage Incidence Rates in the Framingham Heart Study, 1948-2016

| Age group (years) | Women |        |       | Men |        |       | Combined women and men |        |       |
|-------------------|-------|--------|-------|-----|--------|-------|------------------------|--------|-------|
|                   | N     | PY     | Rate* | N   | PY     | Rate* | N                      | PY     | Rate* |
| 45-74             | 8     | 132839 | 6     | 12  | 108711 | 11    | 20                     | 241550 | 8     |
| 75-84             | 14    | 26224  | 53    | 6   | 16588  | 36    | 20                     | 42812  | 47    |
| 85-99             | 9     | 11394  | 79    | 6   | 4563   | 131   | 15                     | 15957  | 94    |
| 45-99             | 31    | 170457 | 18    | 24  | 129862 | 18    | 55                     | 300319 | 18    |
| Age-Adjusted      |       |        | 17    | ..  | ..     | 21    | ..                     | ..     | ..    |

PY: person-years  
\* per 100,000 person-years

**eTable 3.** Unadjusted and Age-Adjusted Incidence Rate Ratios of Intracerebral Hemorrhage in Men vs Women

|       | N  | PY     | Rate* | Crude    |           |         | Adjusted for age |          |           |       |
|-------|----|--------|-------|----------|-----------|---------|------------------|----------|-----------|-------|
|       |    |        |       | Estimate | 95% CI    | P value | Rate*            | Estimate | 95% CI    | p     |
| Men   | 57 | 130210 | 44    | 1.00     | ..        | ref     | 50               | 1.00     | ..        | ref   |
| Women | 72 | 171072 | 42    | 0.96     | 0.68-1.36 | 0.825   | 38               | 0.77     | 0.54-1.09 | 0.142 |

PY: person-years  
 CI: Confidence interval  
 \* per 100,000 person-years

**eTable 4. Anticoagulant Use Trends**

|                                                                                                                                                                                       | <b>Lobar ICH cases and controls*</b> |          |            |
|---------------------------------------------------------------------------------------------------------------------------------------------------------------------------------------|--------------------------------------|----------|------------|
|                                                                                                                                                                                       | Epoch 1                              | Epoch 2  | Epoch 3    |
| N with available data                                                                                                                                                                 | 55                                   | 75       | 40         |
| Using anticoagulant, n(%)                                                                                                                                                             | 1 (1.8)                              | 3 (4.0)  | 3 (7.5)    |
| * anticoagulant use data available on 170/275 (62%) participants                                                                                                                      |                                      |          |            |
|                                                                                                                                                                                       | <b>Deep ICH cases and controls**</b> |          |            |
|                                                                                                                                                                                       | Epoch 1                              | Epoch 2  | Epoch 3    |
| N with available data                                                                                                                                                                 | 44                                   | 62       | 61         |
| Using anticoagulant, n(%)                                                                                                                                                             | 0 (0)                                | 3 (4.8)  | 11 (18)    |
| **anticoagulant use data available on 167/220 (76%) participants                                                                                                                      |                                      |          |            |
|                                                                                                                                                                                       | <b>All ICH cases and controls***</b> |          |            |
|                                                                                                                                                                                       | Epoch 1                              | Epoch 2  | Epoch 3    |
| N with available data                                                                                                                                                                 | 99                                   | 137      | 101        |
| Using anticoagulant, n(%)                                                                                                                                                             | 1 (1.0)                              | 6 (4.4)^ | 14 (13.9)^ |
| ***anticoagulant use data available on 337/495 (68%) participants<br>^ Epoch 3 vs 2 Odds Ratio 3.51 , 95% CI [1.30-9.49], p=0.013 (Age-Adjusted: OR=3.28, 95% CI [1.20-8.95], p=0.020 |                                      |          |            |

**eFigure 1.** Age-Stratified and Sex-Stratified Incidence of Intracerebral Hemorrhage

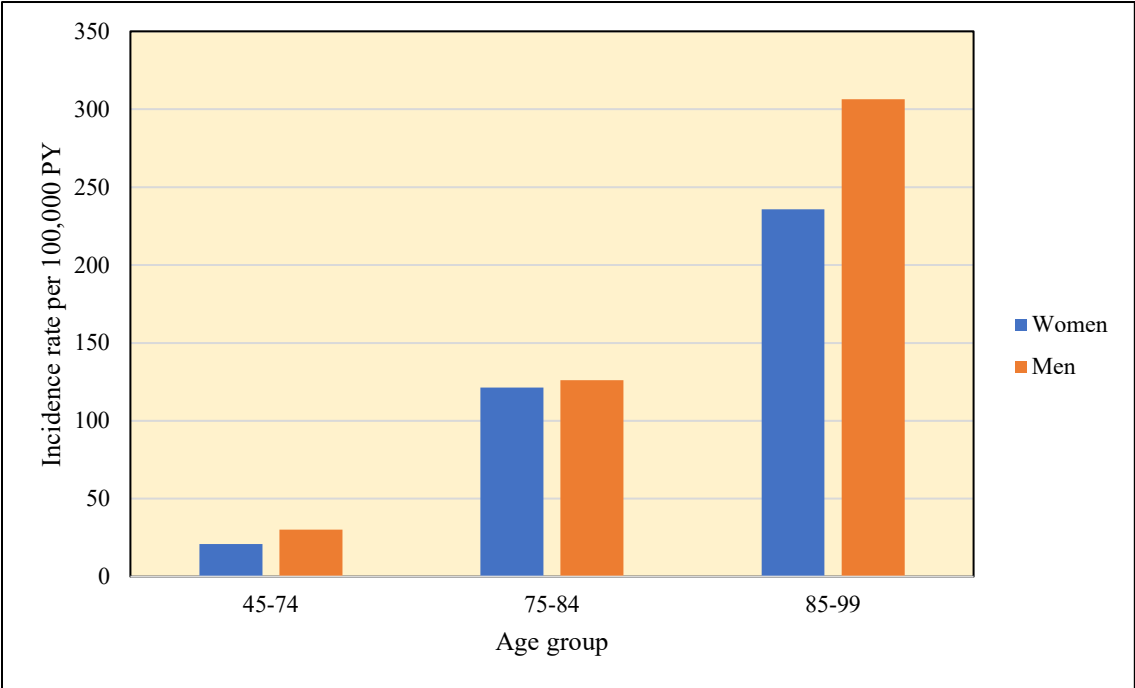

**eFigure 2.** Incidence Rate of Lobar and Deep Intracerebral Hemorrhage Stratified by Age

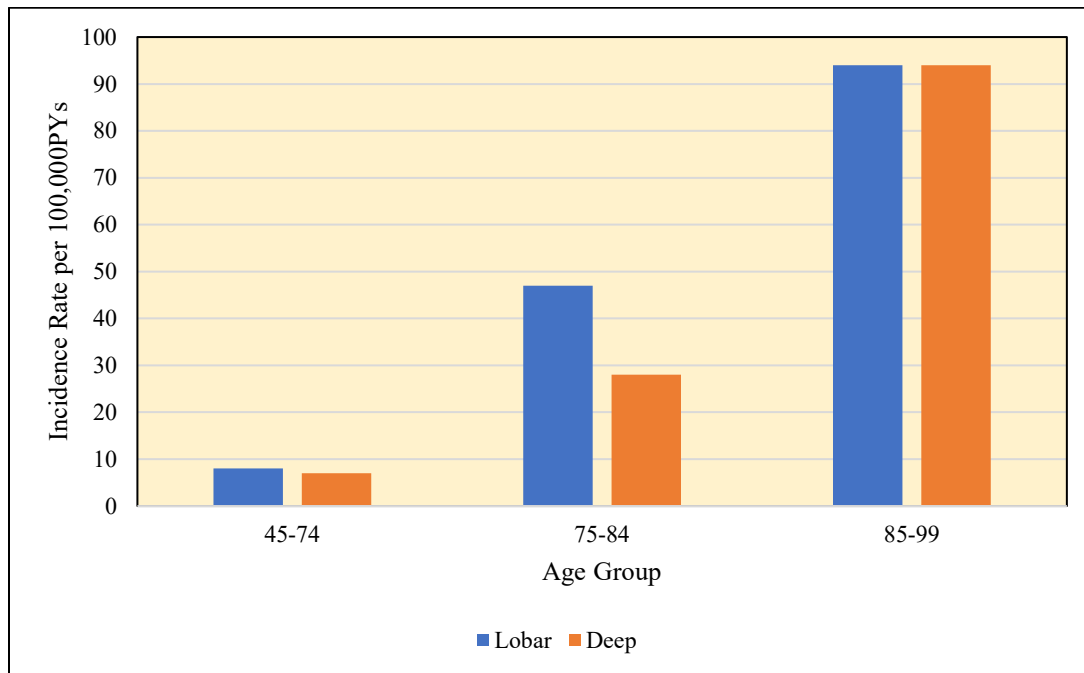

Supplement: jamaneurol-e201512-s001.pdf [file jamaneurol-e201512-s001.pdf]
